# Supplementary material for: Hepatocyte-specific Prominin-1 protects against liver injury-induced fibrosis by stabilizing SMAD7
Source: PubMed Central journal article supplement (PMC9440255; doi:10.1038/s12276-022-00831-y), 2022-08-29
Supplement: 12276_2022_831_MOESM1_ESM.pdf [file 12276_2022_831_MOESM1_ESM.pdf]

# Hepatocyte-specific Prominin-1 protects against liver injury-induced fibrosis by stabilizing SMAD7

Hyun Lee<sup>1,2\*</sup>, Dong-Min Yu<sup>1,2\*</sup>, Myeong-Suk Bahn<sup>1,2\*</sup>, Young-Jae Kwon<sup>1,2</sup>, Min Jee Um<sup>1,2</sup>,  
Seo Yeon Yoon<sup>1,2</sup>, Ki-Tae Kim<sup>1,2</sup>, Myoung-Woo Lee<sup>1,2</sup>, Sung-Je Jo<sup>1,2</sup>, Sungsoo Lee<sup>1,2</sup>, Seung-  
Hoi Koo<sup>1,2</sup>, Ki Hoon Jung<sup>3</sup>, Jae-Seon Lee<sup>4</sup> and Young-Gyu Ko<sup>1,2¶</sup>

<sup>1</sup>Tunneling Nanotube Research Center and <sup>2</sup>Division of Life Sciences, Korea University, Seoul, 02841, Korea, <sup>3</sup>Department of Surgery, Dongguk University College of Medicine, Gyeongju, 38067, Korea and <sup>4</sup>Research Center for Controlling Intercellular Communication, College of Medicine Inha University, Incheon, 22212, Korea

\*These authors contributed equally.

**Keywords:** Prominin-1, Liver Fibrosis, Hepatocytes, TGF $\beta$  signaling and SMAD7

¶To whom correspondence should be addressed

Young-Gyu Ko, Ph. D.

Division of Life Sciences, Korea University

145, Anam-ro, Seongbuk-gu, Seoul, 02841, Korea

e-mail: ygko@korea.ac.kr; TEL: 82-2-3290-3453

## Supplementary Figure Legends

### Supplementary Table 1. Antibodies used in immunostaining and immunoblotting analysis.

### Supplementary Table 2. Primers used in qRT-PCR and genotyping PCR.

### Supplementary Figure 1. Global *Prom1* deficiency aggravates BDL-induced liver fibrosis.

Eight-week-old male *Prom1*<sup>+/+</sup> (WT) and *Prom1*<sup>-/-</sup> (KO) mice were subjected to sham (n=3) or BDL (n=5-6) for one week. (a) Each liver specimen was analyzed by H&E, Masson's Trichrome, Sirius Red staining, and immunofluorescence for PROM1,  $\alpha$ SMA and CK19. (b) Each liver specimen was analyzed by RT-qPCR for mRNA of *Prom1*, *Acta2*, *Coll1a1*, *Krt19*, *Tgfb1*, *Tgfb1*, *Ctgf*, *Pai1*, *Timp1*, *Il1b*, *Il6*, and *Tnfa*. The level of each mRNA was normalized to those of 18S rRNA. (c) The serum levels of aspartate transaminase (AST), alanine aminotransferase (ALT), and bilirubin were determined. Scale bar = 20  $\mu$ m. *t*-test \**p* < 0.05, \*\**p* < 0.01, \*\*\**p* < 0.001. All data are means  $\pm$  S.E.M. *ACTA2*, Alpha-actin-2; *COL1A1*, Alpha-1 type 1 collagen; *Ctgf*, Connective tissue growth factor; *Il1b*, Interleukin 1b; *Il6*, Interleukin 6; *Pai1*, Plasminogen activator inhibitor 1; *Prom1*, Prominin-1; *Tgfb1*, Transforming growth factor beta 1; *Tgfb1*, Transforming growth factor beta receptor 1; *Timp1*, Tissue inhibitor of metalloprotease; *Tnfa*, Tumor necrosis factor 1.

**Supplementary Figure 2. Preparation of liver-specific *Prom1* deficient mice** (a) A scheme for the generation of liver specific *Prom1* deficient mice. Mice were created by crossing *Prom1*<sup>f/f</sup> mice (*f/f*), containing two loxP sequences flanking exon 2 of *Prom1*, with *Alb-Cre*

transgenic mice (*Alb-Cre*). Arrows indicate primers used for genotyping (Supplementary Table 2 shows the sequences of the primers used for genotyping PCR.). (b) Representative PCR products from tail-tip genomic DNA of WT, *ff* and *ff; Alb-Cre* mice. 1<sup>st</sup>, 2<sup>nd</sup> and 4<sup>th</sup> lanes are for the PCR products by primers of F1 and R1; 3<sup>rd</sup> and 5<sup>th</sup> lanes for those by primers of F2, R2 and internal control (*Il-6*). (c) The expression levels of PROM1 in primary hepatocytes (PHs), liver and kidney of *ff* and *ff; Alb-Cre* were determined by immunoblotting.

**Supplementary Figure 3. Preparation of cholangiocyte-specific *Prom1* deficient mice** (a) scheme for the generation of cholangiocyte-specific *Prom1* deficient mice. Mice were created by crossing *Prom1<sup>ff</sup>* mice (*ff*) with *Krt19-Cre* transgenic mice (*Krt19-Cre*). Arrows indicates primers used for genotyping. (b) Representative PCR products from tail-tip genomic DNA of WT, *ff* and *Prom1<sup>ff</sup>; Krt19-Cre* mice. Left panel shows the PCR product by primers of F1 and R2 whereas right panel shows those with primer of F2, R2 and R3. (c) *Prom1* deficiency in cholangiocyte was determined by PROM1 and CK19 immunofluorescence. Arrows indicate CK19-staining cholangiocyte.

**Supplementary Figure 4. Global *Prom1* deficiency enhances TGF $\beta$  signaling by reducing the SMAD7 level in fibrotic liver.** Eight-week-old *Prom1<sup>+/+</sup>* (WT) and *Prom1<sup>-/-</sup>* (KO) were subjected to sham (n=3) and BDL (n=7) for 7 days. (a) Band intensity of p-SMAD2/3,  $\alpha$ SMA, SMAD7 and Cleaved Caspase-3 in BDL liver of WT and KO mice (Fig. 4a) was statistically analyzed after normalized by the band intensity of GAPDH. (b) Each liver specimen was analyzed by immunofluorescence for p-SMAD2/3 and SMAD7 and TUNEL assay. (c) The mRNA levels of *Smad7* from liver specimen of WT and KO mice were determined by RT-qPCR and normalized to those of 18S rRNA. \* $p < 0.05$ , \*\* $p < 0.01$ , n.s; non-significant. All

data are means  $\pm$  S.E.M. Scale bar = 20  $\mu$ m. TUNEL, Terminal deoxynucleotidyl transferase (TdT)-mediated dUTP nick-end labeling.

**Supplementary Figure 5. Truncation mutants of PROM1 (a) and SMAD7 (b) for domain analysis.** EX, extracellular domain; TM, transmembrane domain; IC, intracellular domain; N domain, N-terminal domain; MH2 domain, Mad homology 2 domain.

**Supplementary Figure 6. Adenoviral expression of overexpression of PROM1 in global *Prom1* deficient mice ameliorates BDL-induced liver fibrosis.** Eight-week-old global *Prom1* deficient mice were infected by adenovirus with *LacZ* or *PROM1*. The mice were operated by sham (n=3) or BDL (n=5-9). (a) PROM1 expression in the liver was determined by immunoblotting 3 days after BDL. (b) Seven days after BDL, the liver was analyzed by H&E, and Sirius Red staining and immunofluorescence for  $\alpha$ SMA and CK19, p-SMAD2/3 and SMAD7. (c) Quantification of liver fibrosis was determined by measuring areas stained by Sirius Red. 2-3 images for Sirius Red staining were obtained from each liver. (d) Each specimen was analyzed by immunoblotting for p-SMAD2/3, SMAD2/3, SMAD4, SMAD7,  $\alpha$ SMA, Cleaved Caspase-3 and GAPDH. (e) Band intensity of p-SMAD2/3,  $\alpha$ SMA, SMAD7 and Cleaved Caspase-3 in d was statistically analyzed after normalized by the band intensity of GAPDH. (f) Each liver specimen was analyzed by RT-qPCR for mRNAs of *PROM1*, *Acta2*, *Colla1* and *Krt19*. The mRNA levels were normalized by those of 18S rRNA. Scale bar = 20  $\mu$ m. \* $p$  < 0.05, \*\* $p$  < 0.01, \*\*\* $p$  < 0.001. All data are means  $\pm$  S.E.M.

**Supplementary Figure 7. Proposed model for hepatocytic Prominin-1 protects against**

**liver injury-induced fibrosis by stabilizing SMAD7.** Prominin-1 in the hepatocytes decrease TGF $\beta$  signaling by regulating SMAD7 protein expression. PROM1 prevented SMURF2-induced SMAD7 ubiquitination and degradation by interfering with the molecular association of SMAD7 with SMURF2.

| <b>Name</b> | <b>Company</b>            | <b>Host</b>       | <b>Experiments</b>     |
|-------------|---------------------------|-------------------|------------------------|
| PROM1       | eBioscience               | Rat polyclonal    | IB(1:2000), IHC(1:100) |
| PROM1       | MACS                      | Mouse Monoclonal  | IB(1:200), IFA(1:25)   |
| PROM1       | Merck Millipore           | Mouse monoclonal  | IB(1:1000), IFA(1:100) |
| PROM1       | R&D systems               | Mouse monoclonal  | IB(1:1000), IFA(1:100) |
| a-SMA       | abcam                     | Rabbit polyclonal | IB(1:1000),IHC(1:200)  |
| CK19        | abcam                     | Mouse Monoclonal  | IB(1:1000),IHC(1:200)  |
| SMAD2/3     | Cell Signaling Technology | Rabbit polyclonal | IB(1:1000)             |
| pSMAD2/3    | Cell Signaling Technology | Rabbit polyclonal | IB(1:500), IFA(1:100)  |
| SMAD4       | Cell Signaling Technology | Rabbit polyclonal | IB(1:1000)             |
| SMAD7       | R&D systems               | Mouse monoclonal  | IB(1:1000), IFA(1:100) |
| FLAG        | Sigma-Aldrich             | Rabbit monoclonal | IB(1:2000)             |
| HA          | Merck Millipore           | Mouse monoclonal  | IB(1:1000)             |
| Myc         | Santa Cruz Biotechnology  | Mouse monoclonal  | IB(1:1000)             |
| GAPDH       | Santa Cruz Biotechnology  | mouse monoclonal  | IB(1:2000)             |
| COL1A1      | Cell Signaling Technology | Rabbit monoclonal | IFA(1:200)             |
| Laminin     | abcam                     | Rabbit polyclonal | IFA(1:200)             |

|              | Name             | Forward                  | Reverse                   |
|--------------|------------------|--------------------------|---------------------------|
| qRT-PCR      | <i>Prom1</i>     | CTCATGGCTGGGGTTGGATT     | TGAGCAGATAGGGAGTGTCCA     |
|              | <i>Acta2</i>     | AGCTACGAACTGCCTGACGG     | CGTGGATGCCCCGCTGAC        |
|              | <i>Col1a1</i>    | AGCACGTCTGGTTTGGAGAG     | GACATTAGGCGCAGGAAGGT      |
|              | <i>Tgfb1</i>     | GTCACTGGAGTTGTACGGCA     | GGGGCTGATCCCGTTGATTT      |
|              | <i>Tgfbr1</i>    | GCATTGGCAAAGGTCGGTTT     | TGCCTCTCGGAACCATGAAC      |
|              | <i>Krt19</i>     | GTGCTGGATGAGCTGACTCTG    | GATCTTGGCTAGGTCGACACC     |
|              | <i>Ctgf</i>      | AGGGCCTCTTCTGCGATTTC     | CTTTGGAAGGACTCACCGCT      |
|              | <i>Pai1</i>      | CACAGGCACTGCAAAAGGTC     | TGTGCCGAACCACAAAGAGA      |
|              | <i>Timp1</i>     | GGCATCTGGCATCCTCTTGT     | TGGTCTCGTTGATTTCTGGGG     |
|              | <i>Il1b</i>      | GCCCATCCTCTGTGACTCAT     | AGGCCACAGGTATTTTGTCTG     |
|              | <i>Il6</i>       | TGATGGATGCTACCAAAGTGA    | ACTCTGGCTTTGTCTTTCTTGT    |
|              | <i>Tnfa</i>      | TGGGACAGTGACCTGGACTGT    | TTCGGAAAGCCATTTGAGT       |
|              | <i>Smad7</i>     | GGGGGCTTTCAGATTCCCAA     | GACACAGTAGAGCCTCCCAA      |
| Genotype PCR | Cre transgene    | CCAGGCTAAGTGCCTTCTCTACA  | AATGCTTCTGTCCGTTTGCCGGT   |
|              | Internal control | CTAGGCCAGAGAATTGAAAGATCT | GTAGGTGGAAATTCTAGCATCATCC |
|              | loxP             | ATGGGGAGCATTGATTTGCC     | TCTTTCTGCCTGGTTGCTTT      |

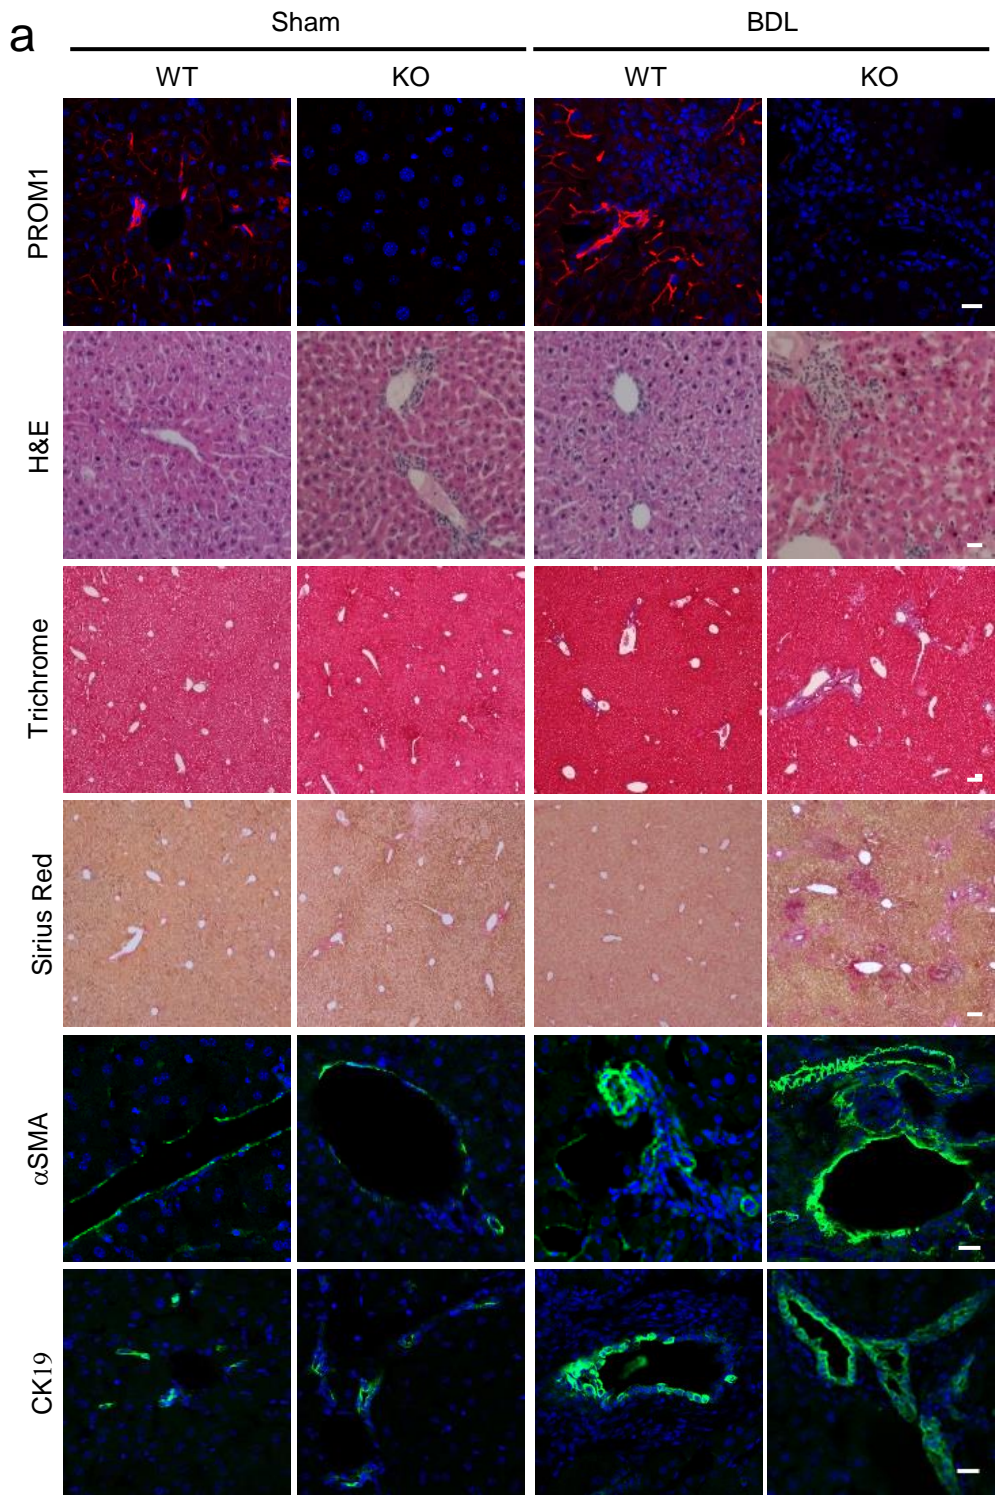

Supplementary Fig. 1



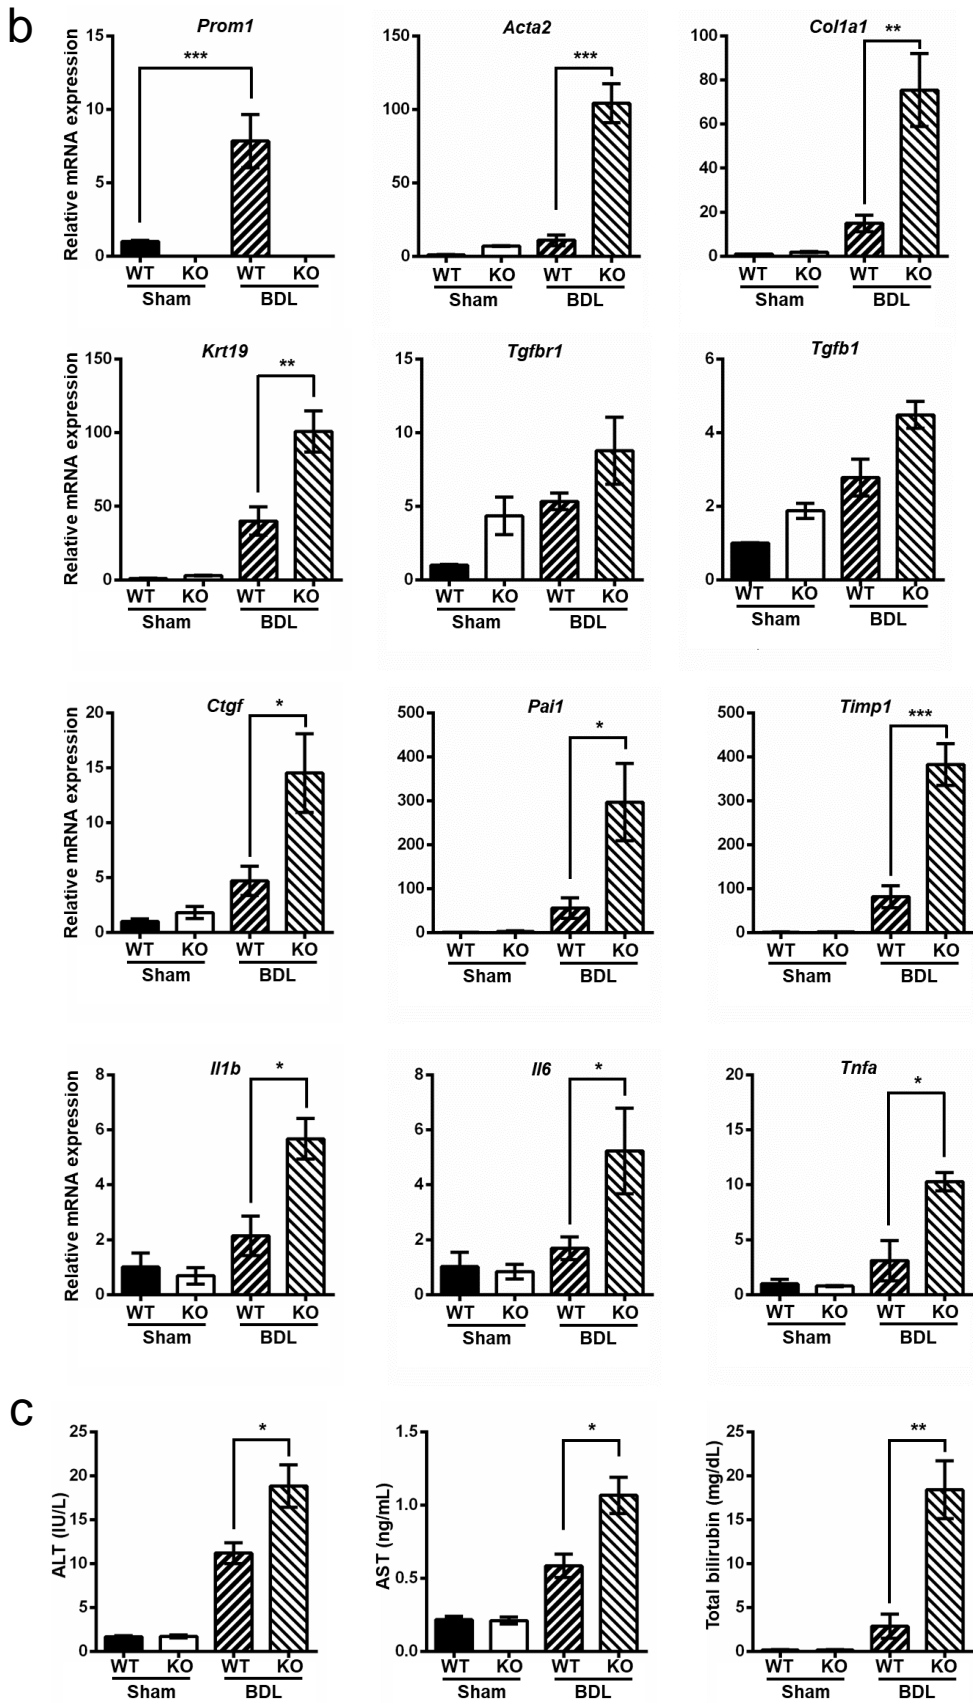

Supplementary Fig. 1, continued

**a**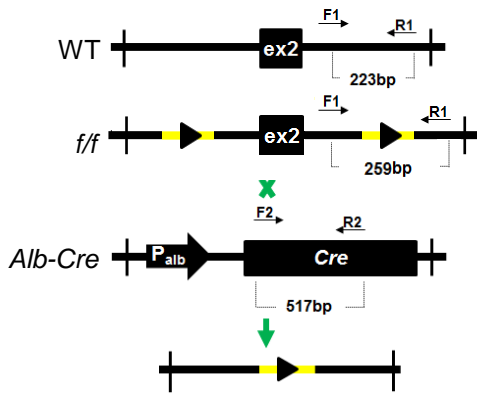**b**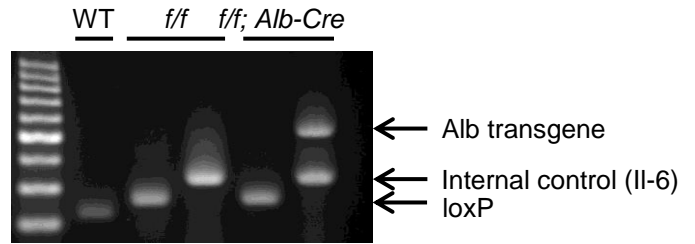**c**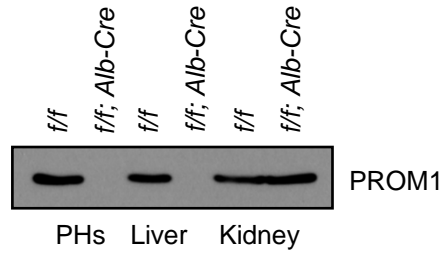

Supplementary Fig. 2

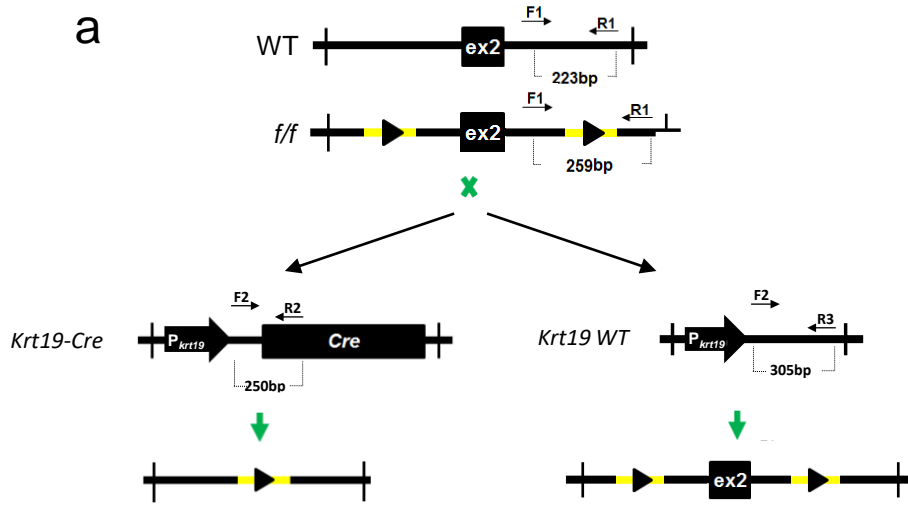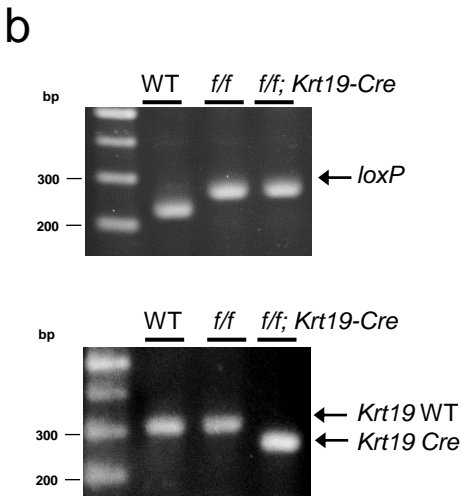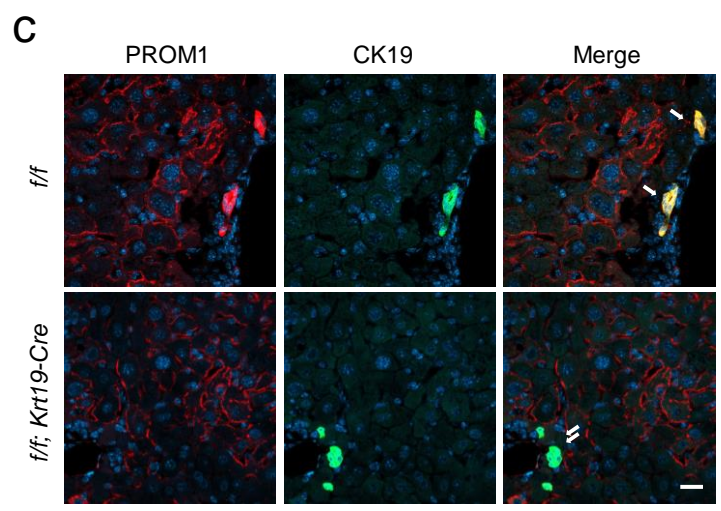

Supplementary Fig. 3

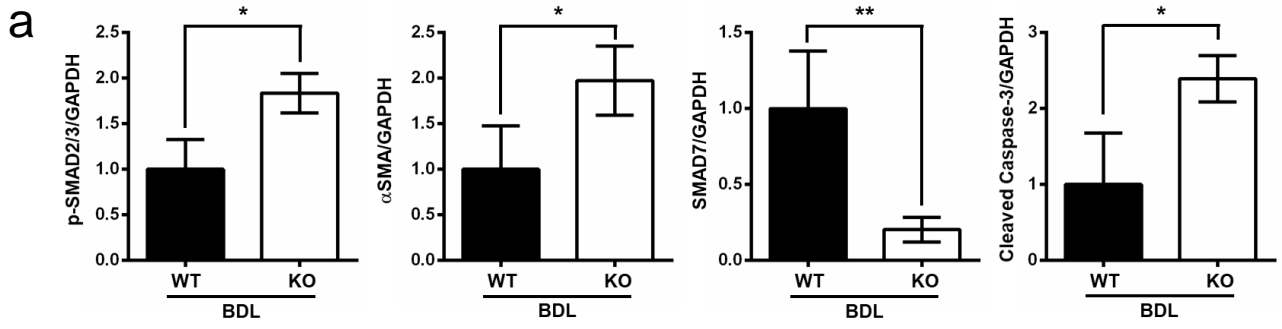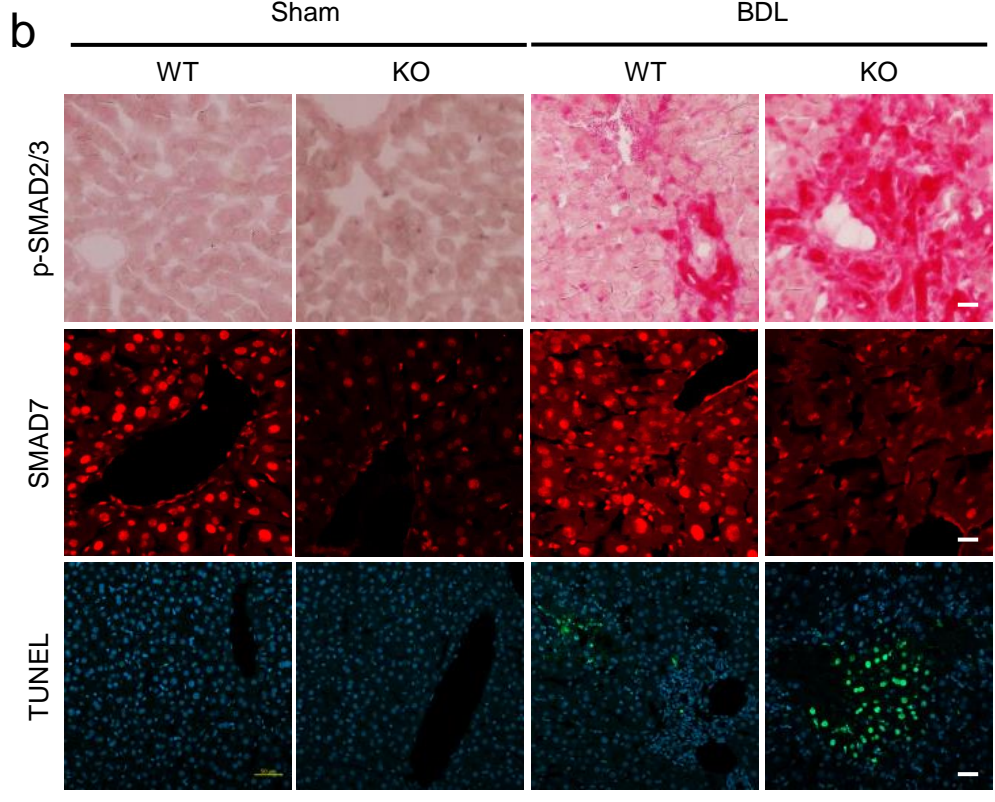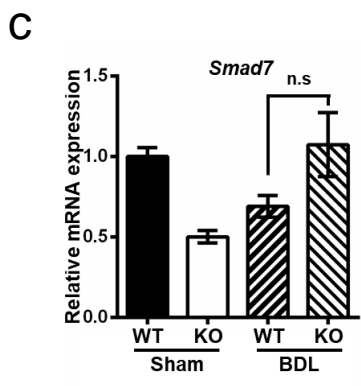

Supplementary Fig. 4

a

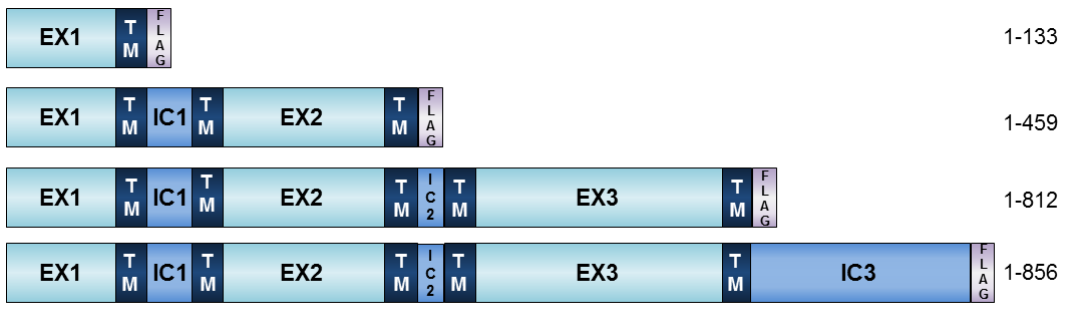

b

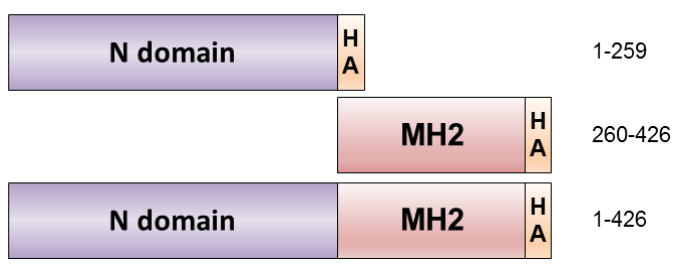

Supplementary Fig. 5

**a**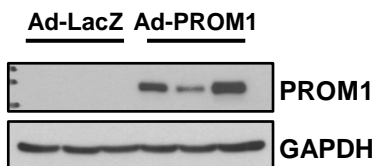**b**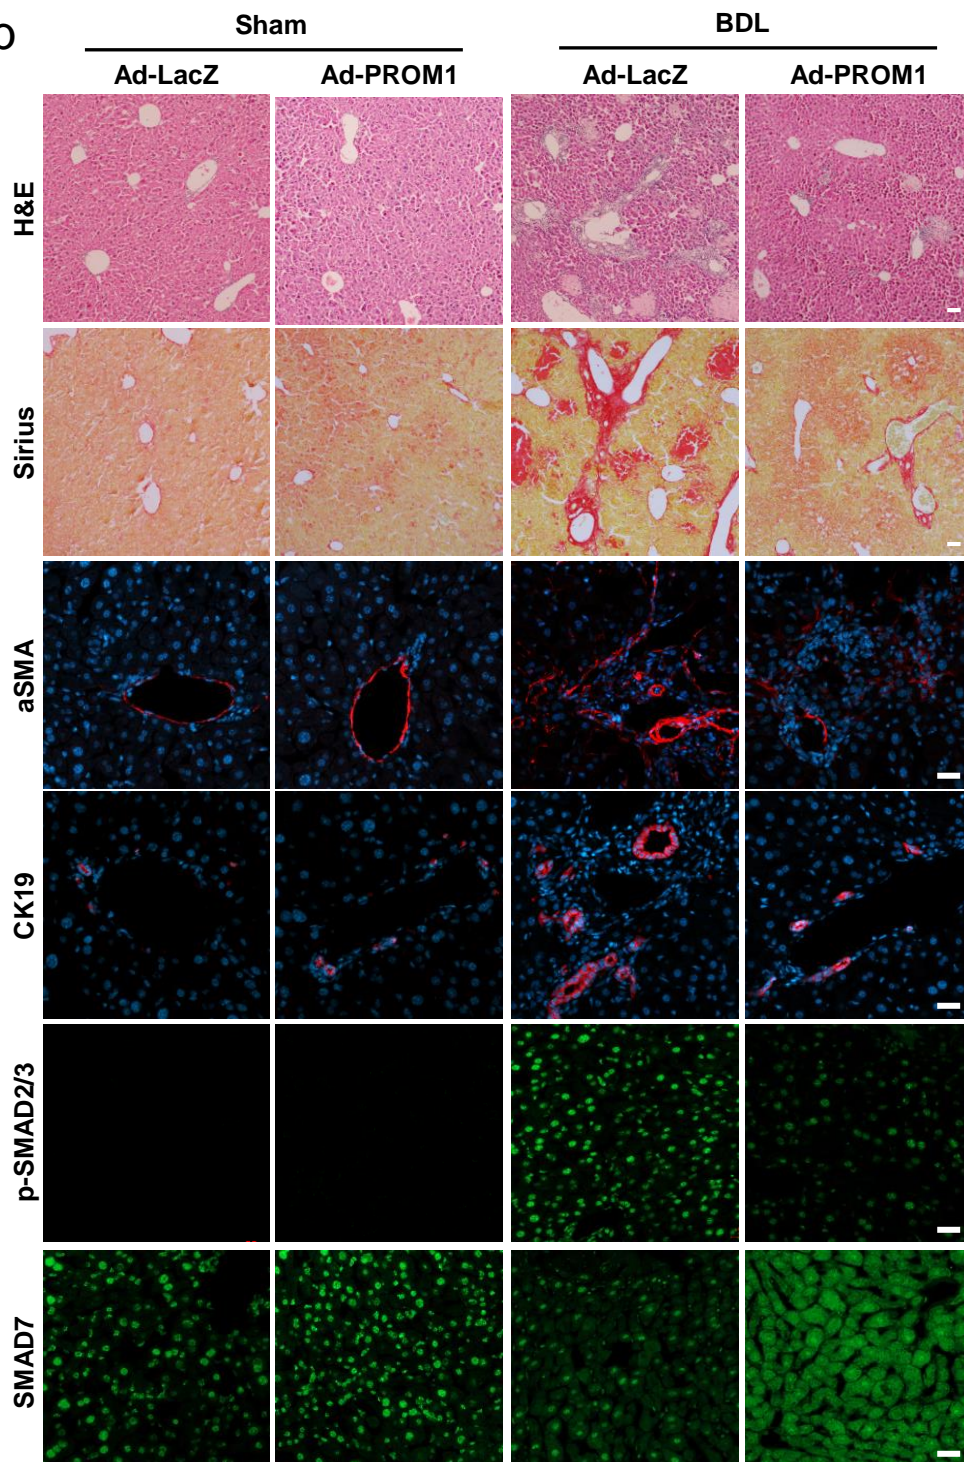

Supplementary Fig. 6

**c**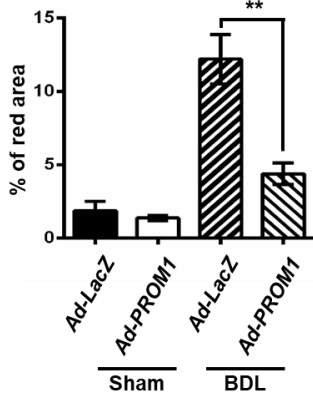**d**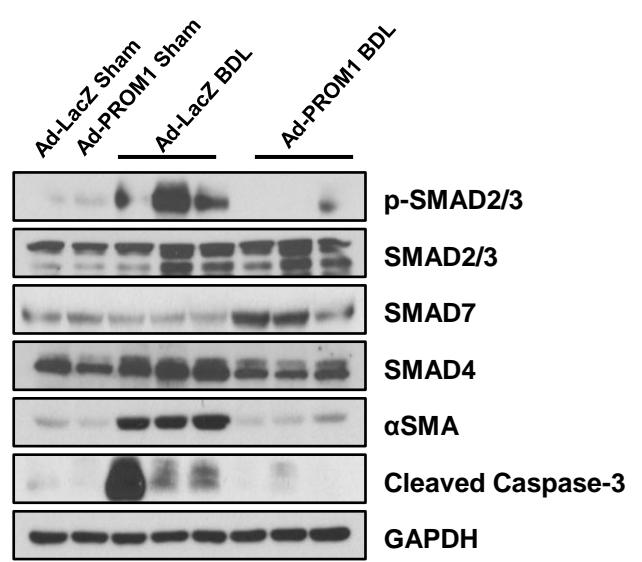**e**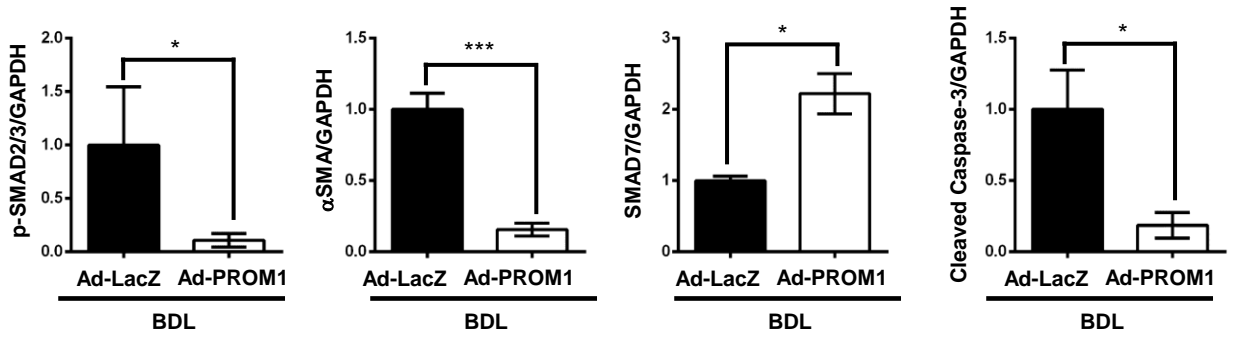**f**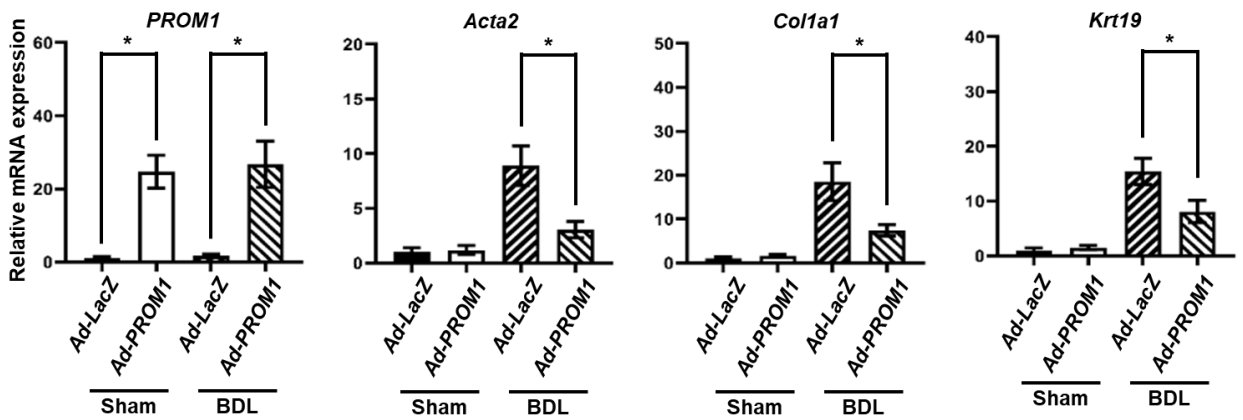

Supplementary Fig. 6, continued

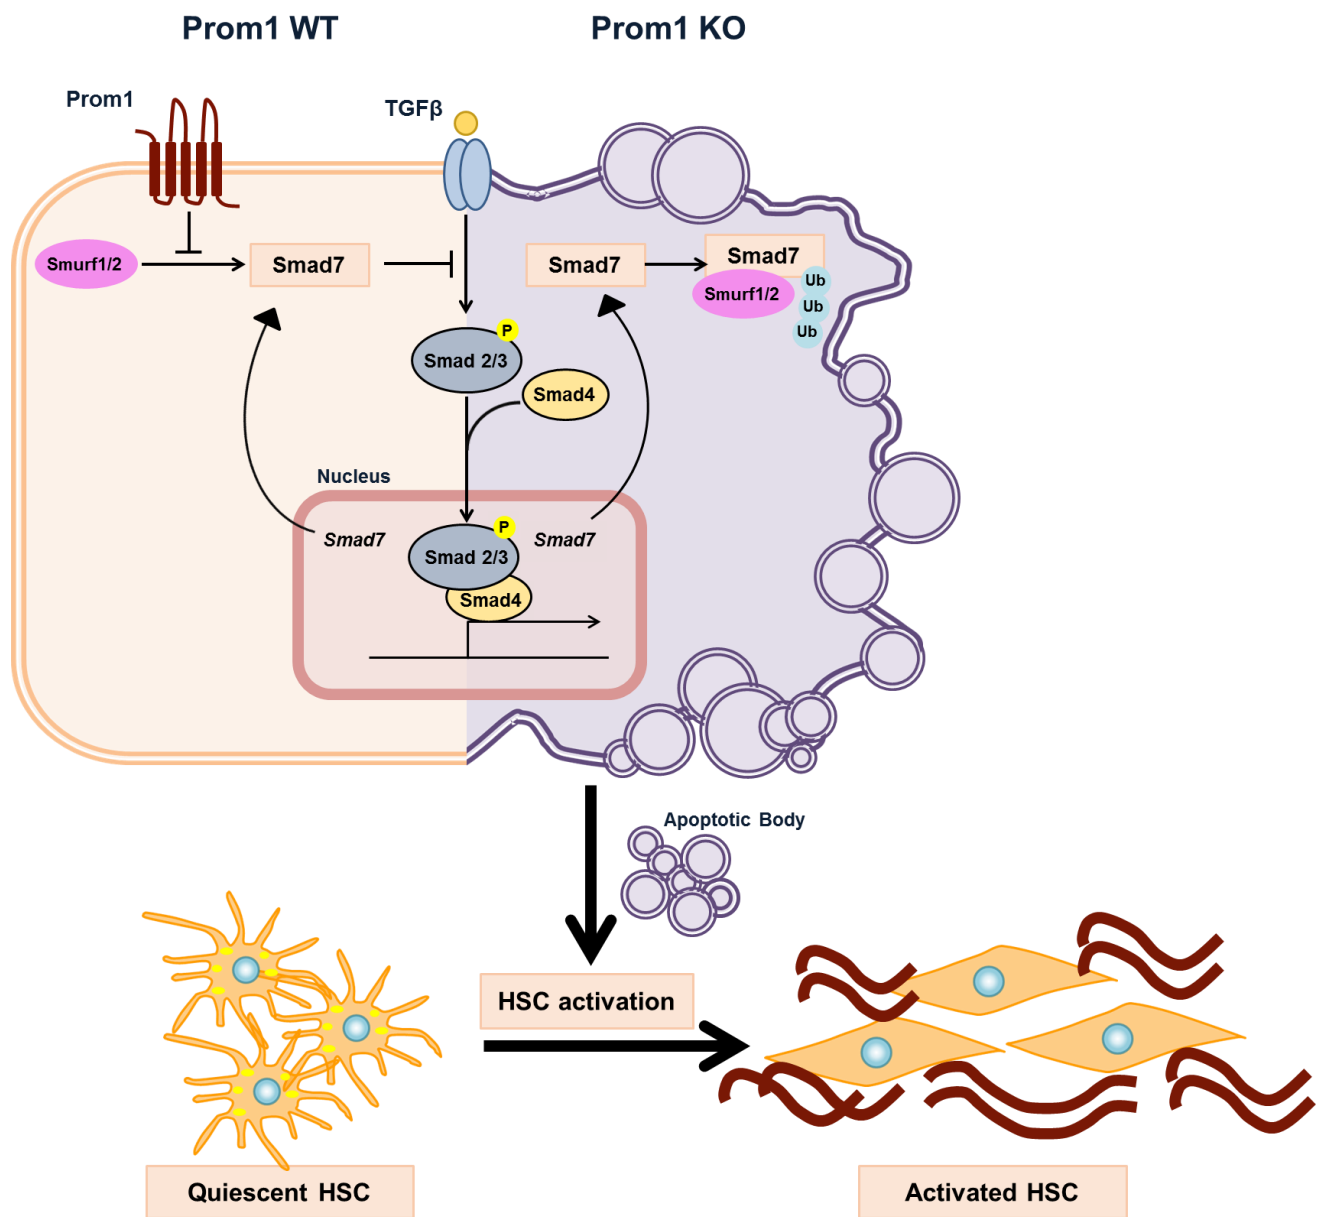

Supplementary Fig. 7
